# Supplementary material for: A predictive signature gene set for discriminating active from latent tuberculosis in Warao Amerindian children
Source: PubMed Central journal article supplement (PMC3600014; doi:10.1186/1471-2164-14-74), 2013-02-01
Supplement: 1471-2164-14-74-S1.pdf [file 1471-2164-14-74-S1.pdf]

**Table S1. Detailed characteristics of children with TB, LTBI and HC in which microarray analyses were performed.**

| Diagnosis           | Sex    | Age (years) | Culture result | TST (mm) | QFT-GIT       | CXR findings                                                                                                                              |
|---------------------|--------|-------------|----------------|----------|---------------|-------------------------------------------------------------------------------------------------------------------------------------------|
| Active TB           | Female | 1,1         | Negative       | 10       | Indeterminate | Ghon focus with cavitation and bilateral bronchopneumonic consolidation, lymph node disease with tracheal compression                     |
| Active TB           | Female | 1,8         | Negative       | 0        | Positive      | Ghon focus with unilateral bronchopneumonic consolidation                                                                                 |
| Active TB           | Male   | 2,3         | Negative       | 3        | Positive      | Ghon focus with bilateral bronchopneumonic consolidation, lymph node disease with bronchial compression and unilateral hyperinflation     |
| Active TB           | Female | 7,5         | Negative       | 6        | Positive      | Adult-type disease with unilateral cavitation and bilateral bronchopneumonic consolidation, lymph node disease with bronchial compression |
| Active TB           | Female | 8,9         | Negative       | 0        | Positive      | Ghon focus with bilateral bronchopneumonic consolidation, lymph node disease with tracheal compression, pleural effusion                  |
| Active TB           | Male   | 10,5        | Negative       | 15       | Positive      | Adult-type disease with unilateral bronchopneumonic consolidation, lymph node disease with unilateral hyperinflation                      |
| Active TB           | Female | 11,5        | Positive       | 18       | Positive      | Adult-type disease with bilateral bronchopneumonic consolidation, lymph node disease                                                      |
| Active TB           | Female | 12,5        | Negative       | 18       | Positive      | Adult-type disease with unilateral cavitation, lymph node disease with lobar alveolar consolidation and unilateral hyperinflation         |
| Active TB           | Female | 14,5        | Positive       | 14       | Positive      | Adult-type disease with bilateral cavitation and unilateral bronchopneumonic consolidation                                                |
| Latent TB infection | Male   | 2,2         | Negative       | 13       | Positive      | No abnormalities observed                                                                                                                 |
| Latent TB infection | Female | 3,0         | Negative       | 11       | Positive      | No abnormalities observed                                                                                                                 |
| Latent TB infection | Male   | 7,0         | Not performed  | 20       | Positive      | No abnormalities observed                                                                                                                 |
| Latent TB infection | Male   | 7,3         | Not performed  | 14       | Positive      | No abnormalities observed                                                                                                                 |
| Latent TB infection | Male   | 9,0         | Not performed  | 14       | Positive      | No abnormalities observed                                                                                                                 |
| Latent TB infection | Female | 10,5        | Not performed  | 10       | Positive      | No abnormalities observed                                                                                                                 |
| Latent TB infection | Female | 12,7        | Not performed  | 14       | Positive      | No abnormalities observed                                                                                                                 |
| Latent TB infection | Male   | 13,9        | Not performed  | 18       | Positive      | No abnormalities observed                                                                                                                 |
| Latent TB infection | Male   | 14,6        | Not performed  | 10       | Positive      | No abnormalities observed                                                                                                                 |
| Healthy control     | Female | 1,3         | Negative       | 0        | Negative      | No abnormalities observed                                                                                                                 |
| Healthy control     | Female | 3,5         | Negative       | 0        | Negative      | No abnormalities observed                                                                                                                 |
| Healthy control     | Female | 4,1         | Negative       | 0        | Negative      | No abnormalities observed                                                                                                                 |
| Healthy control     | Female | 7,8         | Not performed  | 0        | Negative      | No abnormalities observed                                                                                                                 |
| Healthy control     | Male   | 8,0         | Not performed  | 0        | Negative      | No abnormalities observed                                                                                                                 |
| Healthy control     | Female | 8,1         | Not performed  | 0        | Negative      | No abnormalities observed                                                                                                                 |
| Healthy control     | Male   | 9,6         | Not performed  | 0        | Negative      | No abnormalities observed                                                                                                                 |
| Healthy control     | Female | 11,0        | Not performed  | 0        | Negative      | No abnormalities observed                                                                                                                 |
| Healthy control     | Female | 11,5        | Not performed  | 0        | Negative      | No abnormalities observed                                                                                                                 |
