# Supplementary material for: A predictive signature gene set for discriminating active from latent tuberculosis in Warao Amerindian children
Source: PubMed Central journal article supplement (PMC3600014; doi:10.1186/1471-2164-14-74), 2013-02-01
Supplement: 1471-2164-14-74-S2.pdf [file 1471-2164-14-74-S2.pdf]

| Table S2. Enriched gene sets in the 116 gene set. |                                                                     |       |            |                                           |                                        |                                                                                                                                                                                                                                                                                                                                        |
|---------------------------------------------------|---------------------------------------------------------------------|-------|------------|-------------------------------------------|----------------------------------------|----------------------------------------------------------------------------------------------------------------------------------------------------------------------------------------------------------------------------------------------------------------------------------------------------------------------------------------|
| Category                                          | Term                                                                | Genes | Count      | Modifid Fisher exact P value (EASE Score) | Corrected P value (Benjamini-Hochberg) | Genes                                                                                                                                                                                                                                                                                                                                  |
| SP_PIR_KEYWORDS                                   | synapse                                                             | 5     | 4,9019608  | 2,4E-02                                   | 9,9E-01                                | CHRNA7, ACHE, AMPH, CHRM2, GABRA6                                                                                                                                                                                                                                                                                                      |
|                                                   | neurotransmitter receptor                                           | 3     | 2,9411765  | 3,4E-02                                   | 9,7E-01                                | HTR1B, CHRNA7, CHRM2                                                                                                                                                                                                                                                                                                                   |
|                                                   | phosphoprotein                                                      | 47    | 46,0784314 | 3,9E-02                                   | 9,4E-01                                | KLHDC7A, SFN, METTL13, SNX17, ITGA6, SNED1, SFRS7, CD8A, CD8B, TMEM40, HACL1, WDR82, ACAD11, RNF168, NCBP2, SEPT8, SOX4, ZNF192, HEY2, HTR1B, NDUFAF4, FRK, CHRM2, AMPH, PON1, WASL, VPS37A, CNTLN, GLDC, CTNNAL1, TRAF1, TUBAL3, RGS10, SART1, LAYN, HBD, CSDA, KRT8, ANAPC5, CHRNA7, SALL1, SC65, DDX5, POLRMT, RTN2, ARM CX3, DDX3Y |
|                                                   | cell membrane                                                       | 17    | 16,6666667 | 8,9E-02                                   | 9,9E-01                                | S100A8, ITGA6, CD8A, CD8B, GPR78, GABRA6, HTR1B, CHRM2, CALN1, ACHE, SLC26A5, CTNNAL1, OR10A5, CLEC2A, TAS2R46, CHRNA7, KISS1R                                                                                                                                                                                                         |
|                                                   | mrna splicing                                                       | 4     | 3,9215686  | 9,1E-02                                   | 9,8E-01                                | DDX5, NCBP2, SFRS7, SART1                                                                                                                                                                                                                                                                                                              |
|                                                   | heterodimer                                                         | 3     | 2,9411765  | 9,7E-02                                   | 9,7E-01                                | CD8B, S100A8, ITGA6                                                                                                                                                                                                                                                                                                                    |
| UP_SEQ_FEATURE                                    | calcium-binding region 1; low affinity                              | 2     | 1,9607843  | 8,8E-02                                   | 1,0E+00                                | S100A8, S100P                                                                                                                                                                                                                                                                                                                          |
| GOTERM_BP_FAT                                     | GO:0046620~regulation of organ growth                               | 3     | 2,9411765  | 1,1E-02                                   | 1,0E+00                                | CSDA, FGF2, HEY2                                                                                                                                                                                                                                                                                                                       |
|                                                   | GO:0042127~regulation of cell proliferation                         | 10    | 9,8039216  | 2,3E-02                                   | 1,0E+00                                | SFN, FGF2, PGGT1B, NKX2-5, SOX4, HEY2, FRK, CHRNA7, KISS1R, CDKN2D                                                                                                                                                                                                                                                                     |
|                                                   | GO:008361~regulation of cell size                                   | 5     | 4,9019608  | 2,4E-02                                   | 1,0E+00                                | ATP6V0E2, DDX5, CDKN2D, FGF2, SFN                                                                                                                                                                                                                                                                                                      |
|                                                   | GO:0044057~regulation of system process                             | 6     | 5,8823529  | 2,4E-02                                   | 1,0E+00                                | HTR1B, KISS1R, NKX2-5, S100P, ACHE, CHRM2                                                                                                                                                                                                                                                                                              |
|                                                   | GO:0060045~positive regulation of cardiac muscle cell proliferation | 2     | 1,9607843  | 2,6E-02                                   | 9,9E-01                                | FGF2, HEY2                                                                                                                                                                                                                                                                                                                             |
|                                                   | GO:0016202~regulation of striated muscle tissue development         | 3     | 2,9411765  | 2,9E-02                                   | 9,9E-01                                | NKX2-5, FGF2, HEY2                                                                                                                                                                                                                                                                                                                     |
|                                                   | GO:0048634~regulation of muscle development                         | 3     | 2,9411765  | 3,0E-02                                   | 9,8E-01                                | NKX2-5, FGF2, HEY2                                                                                                                                                                                                                                                                                                                     |
|                                                   | GO:0051050~positive regulation of transport                         | 5     | 4,9019608  | 3,1E-02                                   | 9,7E-01                                | KISS1R, NKX2-5, ACHE, NCBP2, PON1                                                                                                                                                                                                                                                                                                      |
|                                                   | GO:0050804~regulation of synaptic transmission                      | 4     | 3,9215686  | 3,6E-02                                   | 9,8E-01                                | HTR1B, KISS1R, S100P, ACHE                                                                                                                                                                                                                                                                                                             |
|                                                   | GO:0060341~regulation of cellular localization                      | 5     | 4,9019608  | 4,3E-02                                   | 9,8E-01                                | HTR1B, KISS1R, ACHE, FGF2, NCBP2                                                                                                                                                                                                                                                                                                       |
|                                                   | GO:0051969~regulation of transmission of nerve impulse              | 4     | 3,9215686  | 4,4E-02                                   | 9,8E-01                                | HTR1B, KISS1R, S100P, ACHE                                                                                                                                                                                                                                                                                                             |
|                                                   | GO:0031644~regulation of neurological system process                | 4     | 3,9215686  | 4,8E-02                                   | 9,8E-01                                | HTR1B, KISS1R, S100P, ACHE                                                                                                                                                                                                                                                                                                             |
|                                                   | GO:0032411~positive regulation of transporter activity              | 2     | 1,9607843  | 5,2E-02                                   | 9,8E-01                                | NKX2-5, PON1                                                                                                                                                                                                                                                                                                                           |
|                                                   | GO:0032535~regulation of cellular component size                    | 5     | 4,9019608  | 5,6E-02                                   | 9,8E-01                                | ATP6V0E2, DDX5, CDKN2D, FGF2, SFN                                                                                                                                                                                                                                                                                                      |
|                                                   | GO:0055024~regulation of cardiac muscle tissue development          | 2     | 1,9607843  | 5,7E-02                                   | 9,7E-01                                | FGF2, HEY2                                                                                                                                                                                                                                                                                                                             |
|                                                   | GO:0055021~regulation of cardiac muscle growth                      | 2     | 1,9607843  | 5,7E-02                                   | 9,7E-01                                | FGF2, HEY2                                                                                                                                                                                                                                                                                                                             |
|                                                   | GO:0060043~regulation of cardiac muscle cell proliferation          | 2     | 1,9607843  | 5,7E-02                                   | 9,7E-01                                | FGF2, HEY2                                                                                                                                                                                                                                                                                                                             |
|                                                   | GO:0016477~cell migration                                           | 5     | 4,9019608  | 5,9E-02                                   | 9,7E-01                                | POU3F3, S100P, FGF2, ITGA6, PODXL                                                                                                                                                                                                                                                                                                      |
|                                                   | GO:0051094~positive regulation of developmental process             | 5     | 4,9019608  | 6,1E-02                                   | 9,7E-01                                | CHRNA7, NKX2-5, FGF2, HEY2, SART1                                                                                                                                                                                                                                                                                                      |
|                                                   | GO:0060420~regulation of heart growth                               | 2     | 1,9607843  | 6,2E-02                                   | 9,6E-01                                | FGF2, HEY2                                                                                                                                                                                                                                                                                                                             |
|                                                   | GO:0043067~regulation of programmed cell death                      | 9     | 8,8235294  | 6,6E-02                                   | 9,6E-01                                | NKX2-5, POU3F3, SOX4, TRAF1, CSDA, CDKN2D, FGF2, SART1, SFN                                                                                                                                                                                                                                                                            |
|                                                   | GO:0010941~regulation of cell death                                 | 9     | 8,8235294  | 6,7E-02                                   | 9,6E-01                                | NKX2-5, POU3F3, SOX4, TRAF1, CSDA, CDKN2D, FGF2, SART1, SFN                                                                                                                                                                                                                                                                            |
|                                                   | GO:008284~positive regulation of cell proliferation                 | 6     | 5,8823529  | 6,9E-02                                   | 9,6E-01                                | CHRNA7, NKX2-5, SOX4, FGF2, HEY2, PGGT1B                                                                                                                                                                                                                                                                                               |
|                                                   | GO:0007268~synaptic transmission                                    | 5     | 4,9019608  | 7,4E-02                                   | 9,6E-01                                | HTR1B, ACHE, AMOH, FGF2, GABRA6                                                                                                                                                                                                                                                                                                        |
|                                                   | GO:0048870~cell motility                                            | 5     | 4,9019608  | 8,1E-02                                   | 9,7E-01                                | POU3F3, S100P, FGF2, ITGA6, PODXL                                                                                                                                                                                                                                                                                                      |
|                                                   | GO:0051674~localization of cell                                     | 5     | 4,9019608  | 8,1E-02                                   | 9,7E-01                                | POU3F3, S100P, FGF2, ITGA6, PODXL                                                                                                                                                                                                                                                                                                      |
|                                                   | GO:0009890~negative regulation of biosynthetic process              | 7     | 6,8627451  | 8,4E-02                                   | 9,7E-01                                | HTR1B, NKX2-5, POU3F3, CSDA, FGF2, HEY2, PGGT1B                                                                                                                                                                                                                                                                                        |
|                                                   | GO:0044093~positive regulation of molecular function                | 7     | 6,8627451  | 9,1E-02                                   | 9,7E-01                                | CHRNA7, KISS1R, NKX2-5, ANAPC5, CHRM2, FGF2, PON1                                                                                                                                                                                                                                                                                      |
|                                                   | GO:0043154~negative regulation of caspase activity                  | 2     | 1,9607843  | 9,2E-02                                   | 9,7E-01                                | CDKN2D, SFN                                                                                                                                                                                                                                                                                                                            |
|                                                   | GO:0051046~regulation of secretion                                  | 4     | 3,9215686  | 9,3E-02                                   | 9,6E-01                                | HTR1B, KISS1R, ACHE, FGF2                                                                                                                                                                                                                                                                                                              |
|                                                   | GO:0010605~negative regulation of macromolecule metabolic process   | 8     | 7,8431373  | 9,5E-02                                   | 9,6E-01                                | NKX2-5, POU3F3, ANAPC5, CSDA, FGF2, HEY2, PON1, PGGT1B                                                                                                                                                                                                                                                                                 |
|                                                   | GO:0031128~developmental induction                                  | 2     | 1,9607843  | 9,6E-02                                   | 9,6E-01                                | FGF2, SALL1                                                                                                                                                                                                                                                                                                                            |
|                                                   | GO:0045168~cell-cell signaling involved in cell fate specification  | 2     | 1,9607843  | 9,6E-02                                   | 9,6E-01                                | FGF2, SALL1                                                                                                                                                                                                                                                                                                                            |
| GOTERM_CC_FAT                                     | GO:0043235~receptor complex                                         | 5     | 4,9019608  | 3,0E-03                                   | 4,0E-01                                | CD8A, CD8B, CHRNA7, GABRA6, ITGA6                                                                                                                                                                                                                                                                                                      |
|                                                   | GO:0030054~cell junction                                            | 7     | 6,8627451  | 5,0E-02                                   | 9,9E-01                                | CHRNA7, ACHE, AMPH, CHRM2, GABRA6, ITGA6, LAYN                                                                                                                                                                                                                                                                                         |
|                                                   | GO:0043025~cell soma                                                | 4     | 3,9215686  | 5,6E-02                                   | 9,6E-01                                | EFHC1, S100P, CHRM2, GABRA6                                                                                                                                                                                                                                                                                                            |
|                                                   | GO:0042101~T cell receptor complex                                  | 2     | 1,9607843  | 6,0E-02                                   | 9,3E-01                                | CD8A, CD8B                                                                                                                                                                                                                                                                                                                             |
| GOTERM_MF_FAT                                     | GO:0042165~neurotransmitter binding                                 | 5     | 4,9019608  | 2,7E-03                                   | 4,9E-01                                | CHRNA7, KISS1R, ACHE, CHRM2, GABRA6                                                                                                                                                                                                                                                                                                    |
|                                                   | GO:0008144~drug binding                                             | 4     | 3,9215686  | 4,0E-03                                   | 3,9E-01                                | HTR1B, CHRM2, GABRA6, PGGT1B                                                                                                                                                                                                                                                                                                           |
|                                                   | GO:0042166~acetylcholine binding                                    | 3     | 2,9411765  | 6,1E-03                                   | 4,0E-01                                | CHRNA7, ACHE, CHRM2                                                                                                                                                                                                                                                                                                                    |
|                                                   | GO:0030594~neurotransmitter receptor activity                       | 4     | 3,9215686  | 1,6E-02                                   | 6,4E-01                                | CHRNA7, KISS1R, CHRM2, GABRA6                                                                                                                                                                                                                                                                                                          |
|                                                   | GO:0043176~amine binding                                            | 4     | 3,9215686  | 2,4E-02                                   | 7,0E-01                                | HTR1B, CHRNA7, ACHE, CHRM2                                                                                                                                                                                                                                                                                                             |
|                                                   | GO:0048037~cofactor binding                                         | 5     | 4,9019608  | 5,1E-02                                   | 8,9E-01                                | HACL1, ERO1L, ACOT7, GLDC, ACAD11                                                                                                                                                                                                                                                                                                      |
|                                                   | GO:0043236~laminin binding                                          | 2     | 1,9607843  | 6,0E-02                                   | 8,9E-01                                | ACHE, ITGA6                                                                                                                                                                                                                                                                                                                            |
|                                                   | GO:0001540~beta-amyloid binding                                     | 2     | 1,9607843  | 7,1E-02                                   | 9,0E-01                                | CHRNA7, ACHE                                                                                                                                                                                                                                                                                                                           |
|                                                   | GO:0050662~coenzyme binding                                         | 4     | 3,9215686  | 8,2E-02                                   | 9,0E-01                                | HACL1, ERO1L, ACOT7, ACAD11                                                                                                                                                                                                                                                                                                            |
|                                                   | GO:0042288~MHC class I protein binding                              | 2     | 1,9607843  | 8,6E-02                                   | 8,9E-01                                | CD8A, CD8B                                                                                                                                                                                                                                                                                                                             |
|                                                   | GO:0030291~protein serine/threonine kinase inhibitor activity       | 2     | 1,9607843  | 9,1E-02                                   | 8,8E-01                                | CDKN2D, SFN                                                                                                                                                                                                                                                                                                                            |
|                                                   | GO:0015464~acetylcholine receptor activity                          | 2     | 1,9607843  | 9,7E-02                                   | 8,8E-01                                | CHRNA7, CHRM2                                                                                                                                                                                                                                                                                                                          |
| KEGG_PATHWAY                                      | regulation of actin cytoskeleton                                    | 5     | 4,9019608  | 4,0E-02                                   | 8,1E-01                                | WASL, CHRM2, FGF2, ITGA6, MOS                                                                                                                                                                                                                                                                                                          |
|                                                   | spliceosome                                                         | 4     | 3,9215686  | 4,0E-02                                   | 5,7E-01                                | DDX5, NCBP2, SFRS7, SART1                                                                                                                                                                                                                                                                                                              |
|                                                   | hematopoietic cell lineage                                          | 3     | 2,9411765  | 9,6E-02                                   | 7,5E-01                                | CD8A, CD8B, ITGA6                                                                                                                                                                                                                                                                                                                      |
| INTERPRO                                          | S100/CaBP-9k-type, calcium binding                                  | 3     | 2,9411765  | 9,7E-03                                   | 8,8E-01                                | S100A8, S100P, CALN1                                                                                                                                                                                                                                                                                                                   |
|                                                   | EF-HAND2                                                            | 5     | 4,9019608  | 2,8E-02                                   | 9,6E-01                                | EFHC1, S100A8, S100P, CALN1, CAPN12                                                                                                                                                                                                                                                                                                    |
|                                                   | EF-HAND1                                                            | 5     | 4,9019608  | 2,9E-02                                   | 8,8E-01                                | EFHC1, S100A8, S100P, CALN1, CAPN12                                                                                                                                                                                                                                                                                                    |
|                                                   | EF-Hand type                                                        | 5     | 4,9019608  | 3,8E-02                                   | 8,8E-01                                | EFHC1, S100A8, S100P, CALN1, CAPN12                                                                                                                                                                                                                                                                                                    |
| PIR_SUPERFAMILY                                   | PIRSF001321:ATP-dependent RNA helicase                              | 2     | 1,9607843  | 8,2E-02                                   | 1,0E+00                                | DDX3Y, DDX5                                                                                                                                                                                                                                                                                                                            |
