# Supplementary material for: A predictive signature gene set for discriminating active from latent tuberculosis in Warao Amerindian children
Source: PubMed Central journal article supplement (PMC3600014; doi:10.1186/1471-2164-14-74), 2013-02-01
Supplement: 1471-2164-14-74-S3.pdf [file 1471-2164-14-74-S3.pdf]

**Table S3 Sheet 1. Minimal discriminatory gene set to discriminate between TB and LTBI.**

|                              | ProbeID      | Gene               | function                                      |
|------------------------------|--------------|--------------------|-----------------------------------------------|
| Berry <i>et al.</i> [4]      | ILMN_1698218 | Traf1 <sup>a</sup> | TNF receptor-associated factor 1              |
|                              | ILMN_1770356 | Polrmt             | polymerase (RNA) mitochondrial (DNA directed) |
|                              | ILMN_1785095 | Atp6v0e2           | ATPase, H+ transporting V0 subunit e2         |
| Maertzdorf <i>et al.</i> [5] | A_23_P89902  | rtn2               | reticulon 2                                   |
|                              | A_24_P89891  | Traf1              | TNF receptor-associated factor 1              |
|                              | A_32_P195291 | rnf168             | ring finger protein 168                       |
| Maertzdorf <i>et al.</i> [6] | A_23_P434809 | S100A8             | S100 calcium binding protein A8               |
|                              | A_24_P89891  | Traf1              | TNF receptor-associated factor 1              |
| This study                   | 2435989      | S100A8             | S100 calcium binding protein A8               |
|                              | 3026216      | CHRM2              | cholinergic receptor, muscarinic 2            |
|                              | 3197955      | Gldc               | glycine dehydrogenase (decarboxylating)       |
|                              | 3360417      | hbd                | hemoglobin, delta                             |
|                              | combined     | S100A8             | S100 calcium binding protein A8               |
|                              |              | CHRM2              | cholinergic receptor, muscarinic 2            |
|                              |              | Gldc               | glycine dehydrogenase (decarboxylating)       |
|                              |              | hbd                | hemoglobin, delta                             |
|                              |              | Traf1              | TNF receptor-associated factor 1              |
|                              |              | Polrmt             | polymerase (RNA) mitochondrial (DNA directed) |
|                              |              | Atp6v0e2           | ATPase, H+ transporting V0 subunit e2         |
|                              |              | rtn2               | reticulon 2                                   |
|                              |              | rnf168             | ring finger protein 168                       |

<sup>a</sup>Overlapping genes (genes that were selected in more than one dataset) are highlighted in yellow

**Table S3 Sheet 2. Minimal discriminatory gene set to discriminate between TB, LTBI and HC.**

|                              | ProbeID      | Gene                                                           | function                                                                                  |
|------------------------------|--------------|----------------------------------------------------------------|-------------------------------------------------------------------------------------------|
| Berry <i>et al.</i> [4]      | ILMN_1740265 | ACOT7 <sup>a</sup>                                             | acyl-CoA thioesterase 7                                                                   |
|                              | ILMN_2334760 | ARMCX3                                                         | armadillo repeat containing, X-linked 3                                                   |
|                              | ILMN_2334765 | ARMCX3                                                         | armadillo repeat containing, X-linked 3                                                   |
|                              | ILMN_1785095 | Atp6v0e2                                                       | ATPase, H+ transporting V0 subunit e2                                                     |
|                              | ILMN_1694798 | C5orf28                                                        | chromosome 5 open reading frame 28                                                        |
|                              | ILMN_2150465 | C5orf28                                                        | chromosome 5 open reading frame 28                                                        |
|                              | ILMN_1804834 | C6orf130                                                       | chromosome 6 open reading frame 130                                                       |
|                              | ILMN_1706275 | c8orf33                                                        | chromosome 8 open reading frame 33                                                        |
|                              | ILMN_2098325 | c8orf33                                                        | chromosome 8 open reading frame 33                                                        |
|                              | ILMN_2101034 | CAPN12                                                         | calpain 12                                                                                |
|                              | ILMN_1787514 | CAPN12                                                         | calpain 12                                                                                |
|                              | ILMN_1760374 | Cd8a                                                           | CD8a molecule                                                                             |
|                              | ILMN_2354191 | CD8B                                                           | CD8b molecule                                                                             |
|                              | ILMN_1748601 | CD8B                                                           | CD8b molecule                                                                             |
|                              | ILMN_1772627 | D4S234E                                                        | DNA segment on chromosome 4 (unique) 234 expressed sequence                               |
|                              | ILMN_1784977 | Dohh                                                           | deoxyhypusine hydroxylase/monooxygenase                                                   |
|                              | ILMN_1798681 | Gabra6                                                         | gamma-aminobutyric acid (GABA) A receptor, alpha 6                                        |
|                              | ILMN_2289775 | HAX1                                                           | HCLS1 associated protein X-1                                                              |
|                              | ILMN_2398903 | HAX1                                                           | HCLS1 associated protein X-1                                                              |
|                              | ILMN_1815527 | hbd                                                            | hemoglobin, delta                                                                         |
|                              | ILMN_2359287 | itga6                                                          | integrin, alpha 6                                                                         |
|                              | ILMN_2267488 | itga6                                                          | integrin, alpha 6                                                                         |
|                              | ILMN_1752591 | LEPROTL1                                                       | leptin receptor overlapping transcript-like 1                                             |
|                              | ILMN_1659524 | LOC100131149                                                   | NADH dehydrogenase (ubiquinone) 1 alpha subcomplex, assembly factor 4; similar to HSPC125 |
|                              | ILMN_1790575 | METTL13                                                        | methyltransferase like 13                                                                 |
|                              | ILMN_1720442 | NCBP2                                                          | nuclear cap binding protein subunit 2, 20kDa                                              |
|                              | ILMN_1659524 | Ndufaf4                                                        | NADH dehydrogenase (ubiquinone) 1 alpha subcomplex, assembly factor 4; similar to HSPC125 |
|                              | ILMN_1723632 | PIGC                                                           | phosphatidylinositol glycan anchor biosynthesis, class C                                  |
|                              | ILMN_2397571 | PIGC                                                           | phosphatidylinositol glycan anchor biosynthesis, class C                                  |
|                              | ILMN_1685357 | rtn2                                                           | reticulon 2                                                                               |
| ILMN_1680145                 | sart1        | squamous cell carcinoma antigen recognized by T cells          |                                                                                           |
| ILMN_1698218                 | Traf1        | TNF receptor-associated factor 1                               |                                                                                           |
| ILMN_1711139                 | vps37a       | vacuolar protein sorting 37 homolog A ( <i>S. cerevisiae</i> ) |                                                                                           |
| ILMN_1666004                 | WASL         | Wiskott-Aldrich syndrome-like                                  |                                                                                           |
| ILMN_1679655                 | wdr82        | WD repeat domain 82                                            |                                                                                           |
| Maertzdorf <i>et al.</i> [5] | A_23_P159335 | CD8B                                                           | CD8b molecule                                                                             |
|                              | A_24_P89891  | Traf1                                                          | TNF receptor-associated factor 1                                                          |
|                              | A_23_P87346  | hbd                                                            | hemoglobin, delta                                                                         |
| Maertzdorf <i>et al.</i> [6] | A_23_P377830 | ANAPC5                                                         | anaphase promoting complex subunit 5                                                      |
|                              | A_23_P61960  | Atp6v0e2                                                       | ATPase, H+ transporting V0 subunit e2                                                     |
|                              | A_23_P33119  | c8orf33                                                        | chromosome 8 open reading frame 33                                                        |
|                              | A_24_P79040  | CAPN12                                                         | calpain 12                                                                                |
|                              | A_32_P163247 | Cd8a                                                           | CD8a molecule                                                                             |
|                              | A_23_P157795 | CTNNAL1                                                        | catenin (cadherin-associated protein), alpha-like 1                                       |
|                              | A_23_P121182 | Hacl1                                                          | 2-hydroxyacyl-CoA lyase 1                                                                 |
|                              | A_23_P210176 | itga6                                                          | integrin, alpha 6                                                                         |
|                              | A_32_P112546 | krt8                                                           | keratin 8 pseudogene 9; similar to keratin 8; keratin 8                                   |
|                              | A_32_P112546 | KRT8P9                                                         | keratin 8 pseudogene 9; similar to keratin 8; keratin 8                                   |
|                              | A_23_P215931 | LEPROTL1                                                       | leptin receptor overlapping transcript-like 1                                             |
|                              | A_24_P171983 | LOC100131149                                                   | NADH dehydrogenase (ubiquinone) 1 alpha subcomplex, assembly factor 4; similar to HSPC125 |
|                              | A_32_P112546 | LOC149501                                                      | keratin 8 pseudogene 9; similar to keratin 8; keratin 8                                   |
|                              | A_24_P157424 | NCBP2                                                          | nuclear cap binding protein subunit 2, 20kDa                                              |
|                              | A_23_P155316 | NCBP2                                                          | nuclear cap binding protein subunit 2, 20kDa                                              |
|                              | A_24_P171983 | Ndufaf4                                                        | NADH dehydrogenase (ubiquinone) 1 alpha subcomplex, assembly factor 4; similar to HSPC125 |
|                              | A_24_P409230 | OR10A2                                                         | olfactory receptor, family 10, subfamily A, member 2                                      |
|                              | A_23_P131096 | Polrmt                                                         | polymerase (RNA) mitochondrial (DNA directed)                                             |
|                              | A_32_P195291 | rnf168                                                         | ring finger protein 168                                                                   |
|                              | A_24_P567454 | rnf168                                                         | ring finger protein 168                                                                   |
| A_23_P89902                  | rtn2         | reticulon 2                                                    |                                                                                           |
| A_23_P434809                 | S100A8       | S100 calcium binding protein A8                                |                                                                                           |
| A_32_P70315                  | timp4        | TIMP metalloproteinase inhibitor 4                             |                                                                                           |
| A_24_P89891                  | Traf1        | TNF receptor-associated factor 1                               |                                                                                           |
| A_24_P379939                 | wdr82        | WD repeat domain 82                                            |                                                                                           |
| This study                   | 3026216      | CHRM2                                                          | cholinergic receptor, muscarinic 2                                                        |
|                              | 3197955      | Gldc                                                           | glycine dehydrogenase (decarboxylating)                                                   |
|                              | 2394626      | ACOT7                                                          | acyl-CoA thioesterase 7                                                                   |
|                              | 2474479      | snx17                                                          | sorting nexin 17                                                                          |
|                              | 3360417      | hbd                                                            | hemoglobin, delta                                                                         |
|                              | 3444525      | TAS2R46                                                        | taste receptor, type 2, member 46                                                         |
| Combined                     |              | ACOT7                                                          | acyl-CoA thioesterase 7                                                                   |
|                              |              | ANAPC5                                                         | anaphase promoting complex subunit 5                                                      |
|                              |              | ARMCX3                                                         | armadillo repeat containing, X-linked 3                                                   |
|                              |              | Atp6v0e2                                                       | ATPase, H+ transporting V0 subunit e2                                                     |
|                              |              | C5orf28                                                        | chromosome 5 open reading frame 28                                                        |
|                              |              | C6orf130                                                       | chromosome 6 open reading frame 130                                                       |
|                              |              | c8orf33                                                        | chromosome 8 open reading frame 33                                                        |
|                              |              | CAPN12                                                         | calpain 12                                                                                |
|                              |              | Cd8a                                                           | CD8a molecule                                                                             |
|                              |              | CD8B                                                           | CD8b molecule                                                                             |
|                              |              | CHRM2                                                          | cholinergic receptor, muscarinic 2                                                        |
|                              |              | CTNNAL1                                                        | catenin (cadherin-associated protein), alpha-like 1                                       |
|                              |              | D4S234E                                                        | DNA segment on chromosome 4 (unique) 234 expressed sequence                               |
|                              |              | Dohh                                                           | deoxyhypusine hydroxylase/monooxygenase                                                   |
|                              |              | Gabra6                                                         | gamma-aminobutyric acid (GABA) A receptor, alpha 6                                        |
|                              |              | Gldc                                                           | glycine dehydrogenase (decarboxylating)                                                   |
|                              |              | Hacl1                                                          | 2-hydroxyacyl-CoA lyase 1                                                                 |
|                              |              | HAX1                                                           | HCLS1 associated protein X-1                                                              |
|                              |              | hbd                                                            | hemoglobin, delta                                                                         |
|                              |              | itga6                                                          | integrin, alpha 6                                                                         |
|                              |              | krt8                                                           | keratin 8 pseudogene 9; similar to keratin 8; keratin 8                                   |
|                              |              | KRT8P9                                                         | keratin 8 pseudogene 9; similar to keratin 8; keratin 8                                   |
|                              |              | LEPROTL1                                                       | leptin receptor overlapping transcript-like 1                                             |
|                              |              | LOC100131149                                                   | NADH dehydrogenase (ubiquinone) 1 alpha subcomplex, assembly factor 4; similar to HSPC125 |
|                              |              | LOC149501                                                      | keratin 8 pseudogene 9; similar to keratin 8; keratin 8                                   |
|                              |              | METTL13                                                        | methyltransferase like 13                                                                 |
|                              |              | NCBP2                                                          | nuclear cap binding protein subunit 2, 20kDa                                              |
|                              |              | Ndufaf4                                                        | NADH dehydrogenase (ubiquinone) 1 alpha subcomplex, assembly factor 4; similar to HSPC125 |
|                              |              | OR10A2                                                         | olfactory receptor, family 10, subfamily A, member 2                                      |
|                              |              | PIGC                                                           | phosphatidylinositol glycan anchor biosynthesis, class C                                  |
|                              | Polrmt       | polymerase (RNA) mitochondrial (DNA directed)                  |                                                                                           |
|                              | rnf168       | ring finger protein 168                                        |                                                                                           |
|                              | rtn2         | reticulon 2                                                    |                                                                                           |
|                              | S100A8       | S100 calcium binding protein A8                                |                                                                                           |
|                              | sart1        | squamous cell carcinoma antigen recognized by T cells          |                                                                                           |
|                              | snx17        | sorting nexin 17                                               |                                                                                           |
|                              | TAS2R46      | taste receptor, type 2, member 46                              |                                                                                           |
|                              | timp4        | TIMP metalloproteinase inhibitor 4                             |                                                                                           |
|                              | Traf1        | TNF receptor-associated factor 1                               |                                                                                           |
|                              | vps37a       | vacuolar protein sorting 37 homolog A ( <i>S. cerevisiae</i> ) |                                                                                           |
|                              | WASL         | Wiskott-Aldrich syndrome-like                                  |                                                                                           |
|                              | wdr82        | WD repeat domain 82                                            |                                                                                           |

<sup>a</sup>Overlapping genes (genes that were selected in more than one dataset) are highlighted in yellow

Table S3 Sheet 3. Variable frequencies estimated by the bootstrapping procedure implemented in VarSelRF (1). The ten genes that were selected for the optimal gene set are highlighted in yellow.

| This study active latent healthy |              |                                                                                                                                                                          |                    |
|----------------------------------|--------------|--------------------------------------------------------------------------------------------------------------------------------------------------------------------------|--------------------|
| Probe                            | Gene         | Function                                                                                                                                                                 | Variable frequency |
| 3157955                          | Gldc         | glycine dehydrogenase (decarboxylating)                                                                                                                                  | 0.34               |
| 3026216                          | CHRM2        | cholinergic receptor, muscarinic 2                                                                                                                                       | 0.29               |
| 3444525                          | TAS2R46      | taste receptor, type 2, member 46                                                                                                                                        | 0.255              |
| 2474479                          | snx17        | sorting nexin 17                                                                                                                                                         | 0.245              |
| 3360417                          | hbd          | hemoglobin, delta                                                                                                                                                        | 0.235              |
| 2394626                          | ACOT7        | acyl-CoA thioesterase 7                                                                                                                                                  | 0.205              |
| 2270778                          | S100P        | S100 calcium binding protein P                                                                                                                                           | 0.16               |
| 3163378                          | Centin3      | centin, centrosomal protein                                                                                                                                              | 0.15               |
| 2721633                          | SOD3         | superoxide dismutase 3, extracellular                                                                                                                                    | 0.15               |
| 3821079                          | LOC55908     | hepatocellular carcinoma-associated gene TD26                                                                                                                            | 0.14               |
| 2871685                          | Pggt1b       | protein geranylgeranyltransferase type I, beta subunit                                                                                                                   | 0.125              |
| 3984945                          | ARMCX3       | armadillo repeat containing, X-linked 3                                                                                                                                  | 0.125              |
| 2663295                          | TMEM40       | transmembrane protein 40                                                                                                                                                 | 0.12               |
| 2716467                          | D4S234E      | DNA segment on chromosome 4 (unique) 234 expressed sequence                                                                                                              | 0.11               |
| 4031692                          | PRY          | PTPN13-like, Y-linked pseudogene 4; PTPN13-like, Y-linked pseudogene 3; PTPN13-like, Y-linked; PTPN13-like, Y-linked 2                                                   | 0.1                |
| 2323285                          | Klhdca7a     | kelch domain containing 7A                                                                                                                                               | 0.095              |
| 2326774                          | SFN          | stratifin                                                                                                                                                                | 0.095              |
| 3061942                          | PON1         | paraoxonase 1                                                                                                                                                            | 0.095              |
| 3474984                          | ANAPCS       | anaplasia promoting complex subunit 5                                                                                                                                    | 0.095              |
| 3339632                          | Rgs10        | regulator of G-protein signalling 10                                                                                                                                     | 0.09               |
| 3691326                          | csll1        | sal-like 1 (Drosophila)                                                                                                                                                  | 0.09               |
| 3851250                          | ZNF20        | zinc finger protein 20                                                                                                                                                   | 0.09               |
| 2695648                          | NPHP3        | nephronophthosis 3 (adolescent); acyl-Coenzyme A dehydrogenase family, member 11                                                                                         | 0.085              |
| 2794679                          | SPATA4       | spermatogenesis associated 4                                                                                                                                             | 0.085              |
| 3329394                          | SC65         | synaptonemal complex protein SC65                                                                                                                                        | 0.085              |
| 3757376                          | SC65         | synaptonemal complex protein SC65                                                                                                                                        | 0.085              |
| 3846214                          | Dohh         | deoxyhypusine hydroxylase/monooxygenase                                                                                                                                  | 0.085              |
| 2444117                          | PIGC         | phosphatidylinositol glycan anchor biosynthesis, class C                                                                                                                 | 0.08               |
| 2742109                          | FGF2         | fibroblast growth factor 2 (basic)                                                                                                                                       | 0.08               |
| 3725896                          | amph         | amphiphysin                                                                                                                                                              | 0.08               |
| 374937                           | gpr78        | G protein-coupled receptor 78                                                                                                                                            | 0.08               |
| 2383999                          | Gabra6       | gamma-aminobutyric acid (GABA) A receptor, alpha 6                                                                                                                       | 0.075              |
| 3046739                          | amph         | amphiphysin                                                                                                                                                              | 0.075              |
| 2712906                          | rnf168       | ring finger protein 168                                                                                                                                                  | 0.07               |
| 2841382                          | Sox4         | SRY (sex determining region Y)-box 4                                                                                                                                     | 0.07               |
| 2897899                          | Sox4         | SRY (sex determining region Y)-box 4                                                                                                                                     | 0.065              |
| 2978097                          | FRK          | fyrr-related kinase                                                                                                                                                      | 0.065              |
| 3057550                          | STYX11       | serine/threonine/tyrosine interacting-like 1                                                                                                                             | 0.065              |
| 3306585                          | saat1        | squamous cell carcinoma antigen recognized by T cells                                                                                                                    | 0.065              |
| 3335802                          | saat1        | squamous cell carcinoma antigen recognized by T cells                                                                                                                    | 0.065              |
| 2497812                          | POU3F3       | POU class 3 homeobox 3                                                                                                                                                   | 0.06               |
| 3443913                          | CLEC2A       | C-type lectin domain family 2, member A                                                                                                                                  | 0.06               |
| 3455515                          | KRT8BP9      | keratin 8 pseudogene 9; similar to keratin 8; keratin 8                                                                                                                  | 0.06               |
| 3849022                          | NF4A14       | zinc finger protein 414                                                                                                                                                  | 0.05               |
| 3232738                          | Traf1        | TNF receptor-associated factor 1                                                                                                                                         | 0.05               |
| 2562965                          | CD8B         | CD8b molecule                                                                                                                                                            | 0.05               |
| 2808612                          | Mrps30       | mitochondrial ribosomal protein S30                                                                                                                                      | 0.05               |
| 2956574                          | LOC100131149 | NADH dehydrogenase (ubiquinone) 1 alpha subcomplex, assembly factor 4; similar to HSPC125                                                                                | 0.05               |
| 3318961                          | OR10A2       | olfactory receptor, family 10, subfamily A, member 2                                                                                                                     | 0.05               |
| 2536071                          | SNEI1        | sushi, nidogen and EGF-like domains 1                                                                                                                                    | 0.045              |
| 2556017                          | C2orf86      | chromosome 2 open reading frame 86                                                                                                                                       | 0.045              |
| 2968399                          | reticulon 2  | reticulon 2                                                                                                                                                              | 0.045              |
| 3865422                          | rtn2         | reticulon 2                                                                                                                                                              | 0.045              |
| 3867426                          | MAMSTR       | MEF2 activating motif and SAP domain containing transcriptional regulator                                                                                                | 0.045              |
| 2562932                          | Cd8a         | CD8a molecule                                                                                                                                                            | 0.04               |
| 3849149                          | NKX2-5       | NK2 transcription factor related, locus 5 (Drosophila)                                                                                                                   | 0.04               |
| 3073013                          | PODXL        | podocalyxin-like                                                                                                                                                         | 0.04               |
| 3136167                          | mos          | v-mos Moloney murine sarcoma viral oncogene homolog                                                                                                                      | 0.04               |
| 3219621                          | CTNNA1       | catenin (cadherin-associated protein), alpha-like 1                                                                                                                      | 0.04               |
| 3850445                          | CDKN2D       | cyclin-dependent kinase inhibitor 2D (p19, inhibits CDK4)                                                                                                                | 0.04               |
| 2544565                          | DNAJC27      | DnaJ (Hsp40) homolog, subfamily C, member 27                                                                                                                             | 0.035              |
| 2616204                          | Fbxl2        | F-box and leucine-rich repeat protein 2                                                                                                                                  | 0.035              |
| 2855578                          | C5orf28      | chromosome 5 open reading frame 28                                                                                                                                       | 0.035              |
| 2875454                          | 39692        | septin 8                                                                                                                                                                 | 0.035              |
| 3031181                          | Atp6v0e2     | ATPase, H+ transporting V0 subunit e2                                                                                                                                    | 0.035              |
| 3551485                          | EM11         | echinoderm microtubule associated protein like 1                                                                                                                         | 0.035              |
| 2413589                          | S100A8       | S100 calcium binding protein A8                                                                                                                                          | 0.03               |
| 2536436                          | Rgs10        | regulator of G-protein signalling 10                                                                                                                                     | 0.03               |
| 2591942                          | ORMDL1       | ORM1-like 1 (S. cerevisiae)                                                                                                                                              | 0.03               |
| 2674414                          | calneuron 1  | calneuron 1                                                                                                                                                              | 0.03               |
| 3055466                          | CALN1        | calneuron 1                                                                                                                                                              | 0.03               |
| 3063461                          | ache         | acetylcholinesterase (Yt blood group)                                                                                                                                    | 0.03               |
| 3092276                          | LEPROTL1     | leptin receptor overlapping transcript-like 1                                                                                                                            | 0.03               |
| 3121023                          | c8orf33      | chromosome 8 open reading frame 33                                                                                                                                       | 0.03               |
| 3335774                          | saat1        | squamous cell carcinoma antigen recognized by T cells                                                                                                                    | 0.03               |
| 3348568                          | LAYN         | layilin                                                                                                                                                                  | 0.03               |
| 3444252                          | CSDAP1       | cold shock domain protein A; cold shock domain protein A pseudogene 1                                                                                                    | 0.03               |
| 3474963                          | EM11         | echinoderm microtubule associated protein like 1                                                                                                                         | 0.03               |
| 3851441                          | ZNF442       | zinc finger protein 442                                                                                                                                                  | 0.03               |
| 3871741                          | ZNF442       | zinc finger protein 442                                                                                                                                                  | 0.03               |
| 2328565                          | Wdr82        | WD repeat domain 82                                                                                                                                                      | 0.025              |
| 2676041                          | wdr82        | WD repeat domain 82                                                                                                                                                      | 0.025              |
| 2713074                          | NCBP2        | nuclear cap binding protein subunit 2, 20kDa                                                                                                                             | 0.025              |
| 2900299                          | ZNF192       | zinc finger protein 192                                                                                                                                                  | 0.025              |
| 2910143                          | HEY2         | hypothetical LOC100129733; hairy/enhancer-of-split related with YRPW motif 2                                                                                             | 0.025              |
| 3065684                          | SLC26A5      | solute carrier family 26, member 5 (prestin)                                                                                                                             | 0.025              |
| 2664395                          | Had1         | 2-hydroxyacyl-CoA lyase 1                                                                                                                                                | 0.02               |
| 2961647                          | HTR1B        | 5-hydroxytryptamine (serotonin) receptor 1B                                                                                                                              | 0.02               |
| 3335830                          |              |                                                                                                                                                                          | 0.02               |
| 3749672                          | LOC100131801 | similar to NC02036585                                                                                                                                                    | 0.02               |
| 3836057                          | LRRRC68      | leucine rich repeat containing 68                                                                                                                                        | 0.02               |
| 3844656                          | Polmt        | polymerease (RNA) mitochondrial (DNA directed)                                                                                                                           | 0.02               |
| 3861503                          | CAPN12       | calpain 12                                                                                                                                                               | 0.02               |
| 2367287                          | METTL13      | methyltransferase like 13                                                                                                                                                | 0.015              |
| 2515627                          | itga6        | integrin, alpha 6                                                                                                                                                        | 0.015              |
| 2548970                          | sfrs7        | splicing factor, arginine/serine-rich 7, 35kDa                                                                                                                           | 0.015              |
| 2924492                          | HEY2         | hypothetical LOC100129733; hairy/enhancer-of-split related with YRPW motif 2                                                                                             | 0.015              |
| 2953435                          | C6orf130     | chromosome 6 open reading frame 130                                                                                                                                      | 0.015              |
| 4030162                          | DDX3Y        | DEAD (Asp-Glu-Ala-Asp) box polypeptide 3, Y-linked                                                                                                                       | 0.015              |
| 2360158                          | HAX1         | HCLS1 associated protein X-1                                                                                                                                             | 0.01               |
| 2454935                          | ANGEL2       | angel homolog 2 (Drosophila)                                                                                                                                             | 0.01               |
| 3070712                          | WASL         | Wiskott-Aldrich syndrome-like                                                                                                                                            | 0.01               |
| 3274888                          | TUBAL3       | tubulin, alpha-like 3                                                                                                                                                    | 0.01               |
| 3766920                          | DDX5         | DEAD (Asp-Glu-Ala-Asp) box polypeptide 5                                                                                                                                 | 0.01               |
| 2663130                          | timp4        | TIMP metalloproteinase inhibitor 4                                                                                                                                       | 0.005              |
| 2910236                          | EFHC1        | EF-hand domain (C-terminal) containing 1                                                                                                                                 | 0.005              |
| 2994835                          | Chn2         | chimerin (chimaerin) 2                                                                                                                                                   | 0.005              |
| 3087555                          | vps37a       | vacuolar protein sorting 37 homolog A (S. cerevisiae)                                                                                                                    | 0.005              |
| 3375612                          | RAB31L1      | RAB3A interacting protein (rab31)-like 1                                                                                                                                 | 0.005              |
| 3564790                          | ERO1L        | ERO1-like (S. cerevisiae)                                                                                                                                                | 0.005              |
| 3587226                          | CHRNA7       | CHRNA7 (cholinergic receptor, nicotinic, alpha 7, exons 5-10) and FAM7A (family with sequence similarity 7A, exons A-E) fusion; cholinergic receptor, nicotinic, alpha 7 | 0.005              |
| 3815268                          | Kiss1r       | KISS1 receptor                                                                                                                                                           | 0.005              |

Berry et al. [4] active latent healthy orthodense

| Probe        | Gene         | Function                                                                                  | Variable frequency |
|--------------|--------------|-------------------------------------------------------------------------------------------|--------------------|
| ILMN_2397571 | PIGC         | phosphatidylinositol glycan anchor biosynthesis, class C                                  | 1                  |
| ILMN_1723632 | PIGC         | phosphatidylinositol glycan anchor biosynthesis, class C                                  | 0.985              |
| ILMN_2334760 | ARMCX3       | armadillo repeat containing, X-linked 3                                                   | 0.95               |
| ILMN_1785095 | Atp6v0e2     | ATPase, H+ transporting V0 subunit e2                                                     | 0.94               |
| ILMN_2398903 | HAX1         | HCLS1 associated protein X-1                                                              | 0.905              |
| ILMN_1711139 | vps37a       | vacuolar protein sorting 37 homolog A (S. cerevisiae)                                     | 0.86               |
| ILMN_1790575 | METTL13      | methyltransferase like 13                                                                 | 0.815              |
| ILMN_1749883 | ERO1L        | ERO1-like (S. cerevisiae)                                                                 | 0.715              |
| ILMN_1685387 | rtn2         | reticulon 2                                                                               | 0.705              |
| ILMN_1752951 | LEPROTL1     | leptin receptor overlapping transcript-like 1                                             | 0.695              |
| ILMN_1706275 | c8orf33      | chromosome 8 open reading frame 33                                                        | 0.65               |
| ILMN_1679655 | wdr82        | WD repeat domain 82                                                                       | 0.64               |
| ILMN_1750658 | HAX1         | HCLS1 associated protein X-1                                                              | 0.625              |
| ILMN_1748883 | CDKN2D       | cyclin-dependent kinase inhibitor 2D (p19, inhibits CDK4)                                 | 0.6                |
| ILMN_1801216 | S100P        | S100 calcium binding protein P                                                            | 0.595              |
| ILMN_1698406 | ORMDL1       | ORM1-like 1 (S. cerevisiae)                                                               | 0.51               |
| ILMN_1694798 | C5orf28      | chromosome 5 open reading frame 28                                                        | 0.495              |
| ILMN_1666004 | WASL         | Wiskott-Aldrich syndrome-like                                                             | 0.49               |
| ILMN_1815745 | Sox4         | SRY (sex determining region Y)-box 4                                                      | 0.485              |
| ILMN_2334760 | ARMCX3       | armadillo repeat containing, X-linked 3                                                   | 0.495              |
| ILMN_2161832 | vps37a       | vacuolar protein sorting 37 homolog A (S. cerevisiae)                                     | 0.42               |
| ILMN_2136446 | CTNNA1       | catenin (cadherin-associated protein), alpha-like 1                                       | 0.405              |
| ILMN_1778121 | CALN1        | calneuron 1                                                                               | 0.365              |
| ILMN_1721901 | CTNNA1       | catenin (cadherin-associated protein), alpha-like 1                                       | 0.31               |
| ILMN_1732810 | snx17        | sorting nexin 17                                                                          | 0.29               |
| ILMN_1659524 | LOC100131149 | NADH dehydrogenase (ubiquinone) 1 alpha subcomplex, assembly factor 4; similar to HSPC125 | 0.255              |
| ILMN_1726743 | Mrps30       | mitochondrial ribosomal protein S30                                                       | 0.255              |
| ILMN_1669005 | CD8B         | CD8b molecule                                                                             | 0.225              |
| ILMN_1772627 | D4S234E      | DNA segment on chromosome 4 (unique) 234 expressed sequence                               | 0.19               |
| ILMN_1778836 | sfrs7        | splicing factor, arginine/serine-rich 7, 35kDa                                            | 0.18               |
| ILMN_1685834 | amph         | amphiphysin                                                                               | 0.175              |
| ILMN_2353732 | Cd8a         | CD8a molecule                                                                             | 0.175              |
| ILMN_1804834 | C6orf130     | chromosome 6 open reading frame 130                                                       | 0.17               |
| ILMN_1720442 | NCBP2        | nuclear cap binding protein subunit 2, 20kDa                                              | 0.145              |
| ILMN_2359287 | itga6        | integrin, alpha 6                                                                         | 0.145              |
| ILMN_2210279 | STYX11       | serine/threonine/tyrosine interacting-like 1                                              | 0.135              |
| ILMN_1760374 | Cd8a         | CD8a molecule                                                                             | 0.12               |
| ILMN_1740265 | ACOT7        | acyl-CoA thioesterase 7                                                                   | 0.11               |
| ILMN_1764714 | LOC55908     | hepatocellular carcinoma-associated gene TD26                                             | 0.105              |
| ILMN_1787514 | CAPN12       | calpain 12                                                                                | 0.1                |
| ILMN_2337377 | rtn2         | reticulon 2                                                                               | 0.1                |
| ILMN_1748601 | CD8B         | CD8b molecule                                                                             | 0.08               |
| ILMN_1736340 | ANGEL2       | angel homolog 2 (Drosophila)                                                              | 0.075              |
| ILMN_1815357 | hbd          | hemoglobin, delta                                                                         | 0.075              |
| ILMN_2098235 | c8orf33      | chromosome 8 open reading frame 33                                                        | 0.075              |
| ILMN_1786881 | Gabra6       | gamma-aminobutyric acid (GABA) A receptor, alpha 6                                        | 0.07               |
| ILMN_1663754 | ZNF442       | zinc finger protein 442                                                                   | 0.05               |
| ILMN_1670377 | ZNF20        | zinc finger protein 20                                                                    | 0.05               |
| ILMN_1729801 | S100A8       | S100 calcium binding protein A8                                                           | 0.05               |
| ILMN_1749115 | rtn2         | reticulon 2                                                                               | 0.05               |
| ILMN_1805344 | DDX5         | DEAD (Asp-Glu-Ala-Asp) box polypeptide 5                                                  | 0.045              |
| ILMN_2354191 | CD8B         | CD8b molecule                                                                             | 0.04               |
| ILMN_1722407 |              |                                                                                           | 0.035              |
| ILMN_1757958 | SLC26A5      | solute carrier family 26, member 5 (prestin)                                              | 0.03               |
| ILMN_1768482 | Cd8a         | CD8a molecule                                                                             | 0.03               |
| ILMN_2267488 | itga6        | integrin, alpha 6                                                                         | 0.025              |
| ILMN_1688218 | Traf1        | TNF receptor-associated factor 1                                                          | 0.02               |
| ILMN_1810436 | DNAJC27      | DnaJ (Hsp40) homolog, subfamily C, member 27                                              | 0.02               |
| ILMN_2101034 | CAPN12       | calpain 12                                                                                | 0.02               |
| ILMN_2150465 | C5orf28      | chromosome 5 open reading frame 28                                                        | 0.02               |
| ILMN_2156786 | Pggt1b       | protein geranylgeranyltransferase type I, beta subunit                                    | 0.02               |
| ILMN_2222786 | ZNF192       | zinc finger protein 192                                                                   | 0.02               |
| ILMN_2332250 | ACOT7        | acyl-CoA thioesterase 7                                                                   | 0.02               |
| ILMN_1766201 |              |                                                                                           | 0.015              |
| ILMN_2045975 | ORMDL1       | ORM1-like 1 (S. cerevisiae)                                                               | 0.015              |
| ILMN_2297511 | PODXL        | podocalyxin-like                                                                          | 0.015              |
| ILMN_2333219 | ache         | acetylcholinesterase (Yt blood group)                                                     | 0.015              |
| ILMN_1680145 | saat1        | squamous cell carcinoma antigen recognized by T cells                                     | 0.01               |
| ILMN_1733538 | Rgs10        | regulator of G-protein signalling 10                                                      | 0.01               |
| ILMN_1749034 | CALN1        | calneuron 1                                                                               | 0.01               |
| ILMN_1770356 | Polrmt       | polymerease (RNA) mitochondrial (DNA directed)                                            | 0.01               |
| ILMN_1806754 | Gldc         | glycine dehydrogenase (decarboxylating)                                                   | 0.01               |
| ILMN_2306929 | C2orf86      | chromosome 2 open reading frame 86                                                        | 0.01               |
| ILMN_2413158 | PODXL        | podocalyxin-like                                                                          | 0.01               |
| ILMN_1682034 | HEY2         | hypothetical LOC100129733; hairy/enhancer-of-split related with YRPW motif 2              | 0.005              |
| ILMN_1761058 | NPHP3        | nephronophthosis 3 (adolescent); acyl-Coenzyme A dehydrogenase family, member 11          | 0.005              |
| ILMN_1761574 | CHRM2        | cholinergic receptor, muscarinic 2                                                        | 0.005              |
| ILMN_1761693 | CALN1        | calneuron 1                                                                               | 0.005              |
| ILMN_1782788 | CSDAP1       | cold shock domain protein A; cold shock domain protein A pseudogene 1                     | 0.005              |
| ILMN_2252621 | ACOT7        | acyl-CoA thioesterase 7                                                                   | 0.005              |
| ILMN_2207161 | NCBP2        | nuclear cap binding protein subunit 2, 20kDa                                              | 0.005              |
| ILMN_2343624 | METTL13      | methyltransferase like 13                                                                 | 0.005              |
| ILMN_2358718 | CHRM2        | cholinergic receptor, muscarinic 2                                                        | 0.005              |

Maertzdorf et al. [5] active latent healthy

| Probe              | Gene     | Function                                                    | Variable frequency |
|--------------------|----------|-------------------------------------------------------------|--------------------|
| A_23_P87346_24390  | hbd      | hemoglobin, delta                                           | 0.75               |
| A_23_P159335_43831 | CD8B     | CD8b molecule                                               | 0.595              |
| A_24_P89891_13200  | Traf1    | TNF receptor-associated factor 1                            | 0.565              |
| A_23_P434809_28674 | S100A8   | S100 calcium binding protein A8                             | 0.5                |
| A_23_P131096_21786 | Polrmt   | polymerease (RNA) mitochondrial (DNA directed)              | 0.325              |
| A_23_P371107_37642 | D4S234E  | DNA segment on chromosome 4 (unique) 234 expressed sequence | 0.31               |
| A_23_P157795_14744 | CTNNA1   | catenin (cadherin-associated protein), alpha-like 1         | 0.27               |
| A_23_P163247_32401 | ZNF414   | zinc finger protein 414                                     | 0.19               |
| A_23_P137881_14587 | CD8B     | CD8b molecule                                               | 0.18               |
| A_32_P95082_20313  | Cntin    | centin, centrosomal protein                                 | 0.18               |
| A_23_P147698_17912 | CALN1    | calneuron 1                                                 | 0.175              |
| A_23_P61960_33699  | Atp6v0e2 |                                                             |                    |

**Table S3 Sheet 4. Variable frequencies estimated by the bootstrapping procedure implemented in VarSelfRF (2). The ten genes that were selected for the optimal gene set are highlighted in yellow.**

| Gene name    | Variable frequencies |                         |                              |                              |
|--------------|----------------------|-------------------------|------------------------------|------------------------------|
|              | This study           | Berry <i>et al.</i> [4] | Maertzdorf <i>et al.</i> [5] | Maertzdorf <i>et al.</i> [6] |
| hbd          | 0.235                | 0.075                   | 0.75                         | 0.09                         |
| S100P        | 0.16                 | 0.595                   | 0.03                         | 0                            |
| snx17        | 0.245                | 0.29                    | 0                            | 0.035                        |
| ACOT7        | 0.205                | 0.11                    | 0.01                         | 0.075                        |
| Gldc         | 0.34                 | 0.01                    | 0                            | 0                            |
| CHRM2        | 0.29                 | 0.005                   | 0                            | 0                            |
| TAS2R46      | 0.255                | 0                       | 0                            | 0                            |
| D4S234E      | 0.11                 | 0.19                    | 0.31                         | 0.04                         |
| CD8B         | 0.05                 | 0.225                   | 0.595                        | 0.07                         |
| CTNNAL1      | 0.04                 | 0.405                   | 0.27                         | 0.465                        |
| CALN1        | 0.03                 | 0.365                   | 0.175                        | 0                            |
| PIGC         | 0.08                 | 1                       | 0.03                         | 0.01                         |
| ampH         | 0.075                | 0.175                   | 0.005                        | 0.01                         |
| STYXL1       | 0.065                | 0.135                   | 0.015                        | 0.01                         |
| ARMCX3       | 0.125                | 0.95                    | 0.005                        | 0.005                        |
| LOC100131149 | 0.05                 | 0.255                   | 0.045                        | 0.29                         |
| C5orf28      | 0.035                | 0.495                   | 0                            | 0.1                          |
| Atp6v0e2     | 0.035                | 0.94                    | 0.155                        | 0.09                         |
| LEPROTL1     | 0.03                 | 0.695                   | 0.005                        | 0.46                         |
| c8orf33      | 0.03                 | 0.65                    | 0.02                         | 0.095                        |
| wdr82        | 0.025                | 0.64                    | 0.035                        | 0.2                          |
| METTL13      | 0.015                | 0.815                   | 0.015                        | 0                            |
| HAX1         | 0.01                 | 0.905                   | 0                            | 0.005                        |
| WASL         | 0.01                 | 0.49                    | 0.01                         | 0.005                        |
| Cntln        | 0.16                 | 0                       | 0.18                         | 0.04                         |
| LOC55908     | 0.14                 | 0.105                   | 0                            | 0.01                         |
| Sox4         | 0.065                | 0.485                   | 0.01                         | 0.005                        |
| ZNF414       | 0.06                 | 0                       | 0.19                         | 0.015                        |
| Traf1        | 0.055                | 0.02                    | 0.565                        | 0.495                        |
| Mrps30       | 0.05                 | 0.255                   | 0.005                        | 0                            |
| rtn2         | 0.045                | 0.705                   | 0.145                        | 0.905                        |
| CDKN2D       | 0.04                 | 0.6                     | 0                            | 0.03                         |
| Cd8a         | 0.04                 | 0.175                   | 0.135                        | 0.395                        |
| ORMDL1       | 0.03                 | 0.51                    | 0                            | 0.025                        |
| S100A8       | 0.03                 | 0.05                    | 0.5                          | 0.055                        |
| NCBP2        | 0.025                | 0.145                   | 0.045                        | 0.17                         |
| CAPN12       | 0.02                 | 0.1                     | 0.01                         | 0.49                         |
| Polrmt       | 0.02                 | 0.01                    | 0.325                        | 0.47                         |
| itga6        | 0.015                | 0.145                   | 0                            | 0.115                        |
| C6orf130     | 0.015                | 0.17                    | 0                            | 0                            |
| sfrs7        | 0.015                | 0.18                    | 0.005                        | 0.065                        |
| SOD3         | 0.15                 | 0                       | 0.01                         | 0.005                        |
| Pggt1b       | 0.125                | 0.02                    | 0.03                         | 0                            |
| TMEM40       | 0.12                 | 0                       | 0.085                        | 0.005                        |
| PRY          | 0.1                  | 0                       | 0                            | 0.005                        |
| PON1         | 0.095                | 0                       | 0.01                         | 0                            |
| ANAPC5       | 0.095                | 0                       | 0.015                        | 0.2                          |
| SFN          | 0.095                | 0                       | 0.02                         | 0                            |
| Klhdc7a      | 0.095                | 0                       | 0.02                         | 0                            |
| sall1        | 0.09                 | 0                       | 0                            | 0                            |
| Rgs10        | 0.09                 | 0.01                    | 0                            | 0                            |
| ZNF20        | 0.09                 | 0.05                    | 0.005                        | 0                            |
| Dohh         | 0.085                | 0                       | 0                            | 0.005                        |
| SPATA4       | 0.085                | 0                       | 0                            | 0                            |
| NPHP3        | 0.085                | 0.005                   | 0.01                         | 0                            |
| Sc65         | 0.085                | 0                       | 0.04                         | 0                            |
| FGF2         | 0.08                 | 0                       | 0.085                        | 0.02                         |
| Gabra6       | 0.075                | 0.07                    | 0.005                        | 0.045                        |
| gpr78        | 0.075                | 0                       | 0.01                         | 0.005                        |
| rnf168       | 0.07                 | 0                       | 0                            | 0.78                         |
| FRK          | 0.065                | 0                       | 0                            | 0.01                         |
| sart1        | 0.065                | 0.01                    | 0                            | 0                            |
| POU3F3       | 0.06                 | 0                       | 0                            | 0.01                         |
| CLEC2A       | 0.06                 | 0                       | 0                            | 0                            |
| KRT8P9       | 0.06                 | 0                       | 0.03                         | 0.2                          |
| OR10A2       | 0.05                 | 0                       | 0                            | 0.255                        |
| MAMSTR       | 0.045                | 0                       | 0                            | 0                            |
| C2orf86      | 0.045                | 0.01                    | 0.01                         | 0.005                        |
| SNED1        | 0.045                | 0                       | 0.025                        | 0.005                        |
| mos          | 0.04                 | 0                       | 0                            | 0.005                        |
| NKX2-5       | 0.04                 | 0                       | 0                            | 0                            |
| PODXL        | 0.04                 | 0.015                   | 0.005                        | 0                            |
| Fbx12        | 0.035                | 0                       | 0.005                        | 0                            |
| 39692        | 0.035                | 0                       | 0.01                         | 0                            |
| DNAJC27      | 0.035                | 0.02                    | 0.015                        | 0.015                        |
| EML1         | 0.035                | 0                       | 0.02                         | 0.005                        |
| LAYN         | 0.03                 | 0                       | 0                            | 0                            |
| ZNF442       | 0.03                 | 0.05                    | 0.01                         | 0                            |
| ache         | 0.03                 | 0.015                   | 0.015                        | 0.005                        |
| CSDAP1       | 0.03                 | 0.005                   | 0.155                        | 0.06                         |
| SLC26A5      | 0.025                | 0.03                    | 0                            | 0                            |
| ZNF192       | 0.025                | 0.02                    | 0.01                         | 0                            |
| LOC100131801 | 0.02                 | 0                       | 0                            | 0                            |
| LRRC68       | 0.02                 | 0                       | 0.015                        | 0.005                        |
| Hacl1        | 0.02                 | 0                       | 0.035                        | 0.155                        |
| HTR1B        | 0.02                 | 0                       | 0.06                         | 0                            |
| HEY2         | 0.015                | 0.005                   | 0.005                        | 0                            |
| DDX3Y        | 0.015                | 0                       | 0.025                        | 0                            |
| DDX5         | 0.01                 | 0.045                   | 0                            | 0.005                        |
| ANGEL2       | 0.01                 | 0.075                   | 0                            | 0.015                        |
| TUBAL3       | 0.01                 | 0                       | 0.005                        | 0.02                         |
| vps37a       | 0.005                | 0.86                    | 0                            | 0                            |
| ERO1L        | 0.005                | 0.725                   | 0.06                         | 0.02                         |
| timp4        | 0.005                | 0                       | 0                            | 0.08                         |
| Kiss1r       | 0.005                | 0                       | 0                            | 0.03                         |
| EFHC1        | 0.005                | 0                       | 0.005                        | 0.005                        |
| RAB3IL1      | 0.005                | 0                       | 0.005                        | 0                            |
| CHRNA7       | 0.005                | 0                       | 0.005                        | 0                            |
| Chn2         | 0.005                | 0                       | 0.005                        | 0                            |
| Bach1        | 0                    | 0                       | 0.005                        | 0.005                        |
| mRpS33       | 0                    | 0                       | 0.005                        | 0                            |
| FLJ46111     | 0                    | 0                       | 0.01                         | 0                            |
| Cpz          | 0                    | 0                       | 0.01                         | 0                            |
