# Supplementary material for: A predictive signature gene set for discriminating active from latent tuberculosis in Warao Amerindian children
Source: PubMed Central journal article supplement (PMC3600014; doi:10.1186/1471-2164-14-74), 2013-02-01

ACOT7 ( $p = 0.23$ )

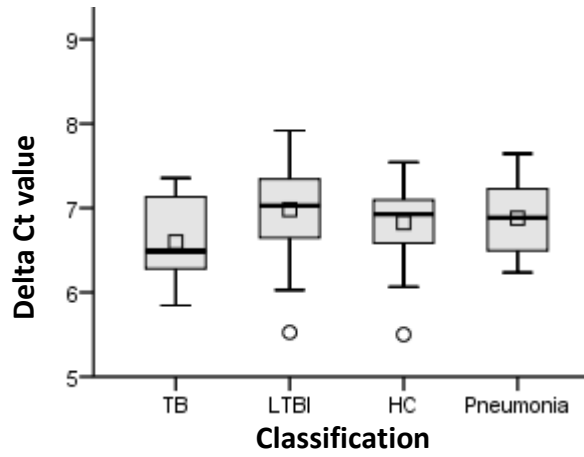

AMPH ( $p = 0.96$ )

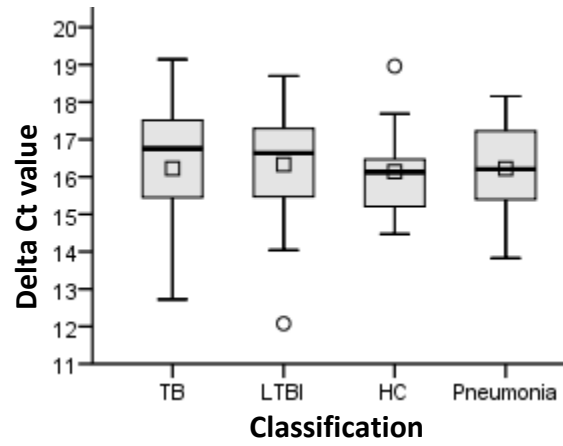

CHRM2 ( $p = 0.29$ )

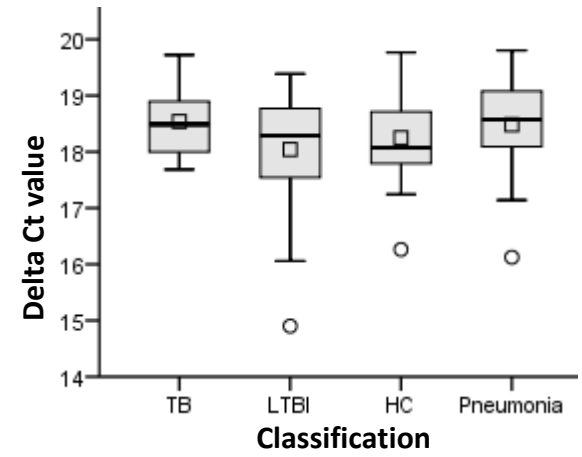

GLDC ( $p = 0.016$ )

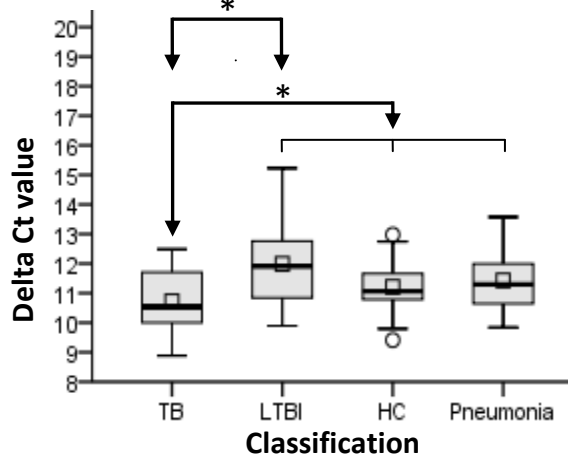

HBD ( $p < 0.01$ )

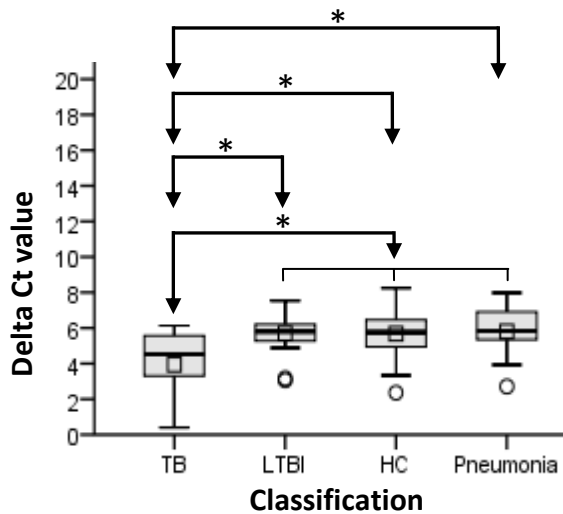

PIGC ( $p = 0.021$ )

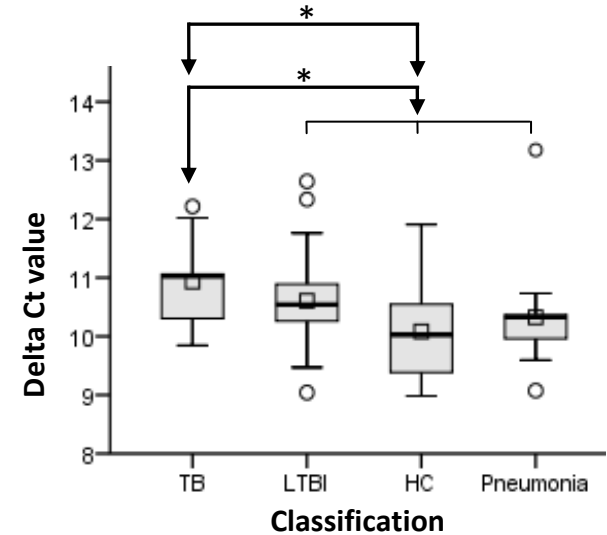

S100P ( $p < 0.01$ )

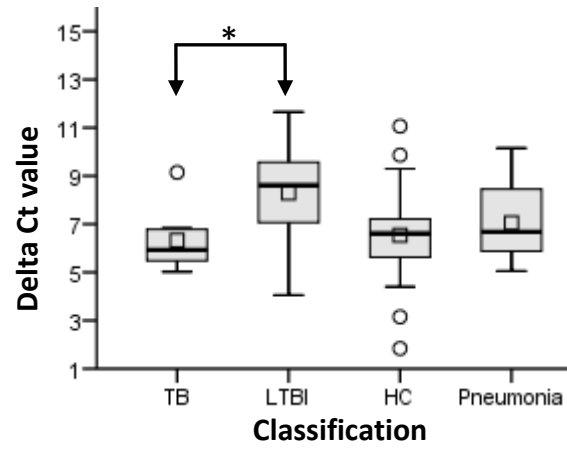

SNX17 ( $p = 0.032$ )

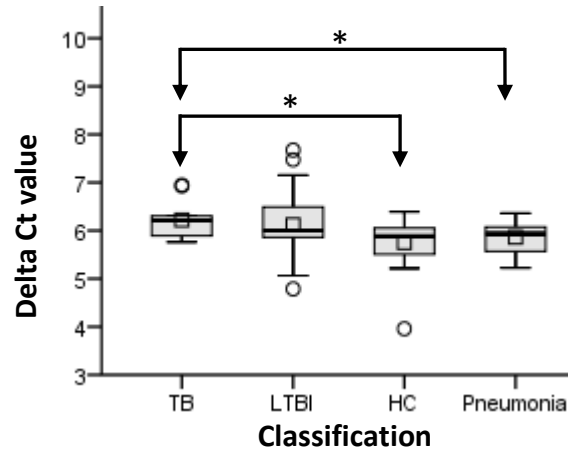

STYXL1 ( $p = 0.14$ )

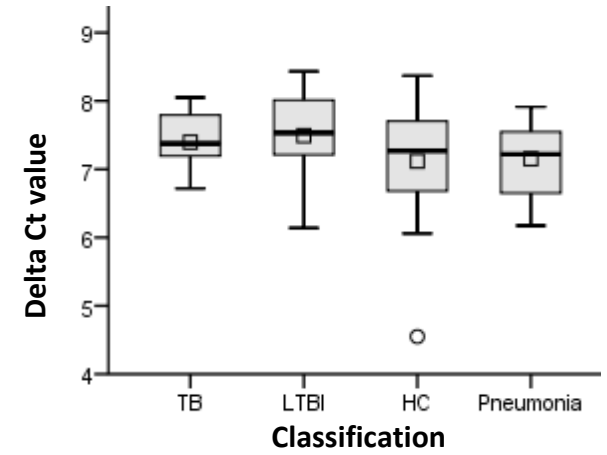

TAS2R46 ( $p = 0.096$ )

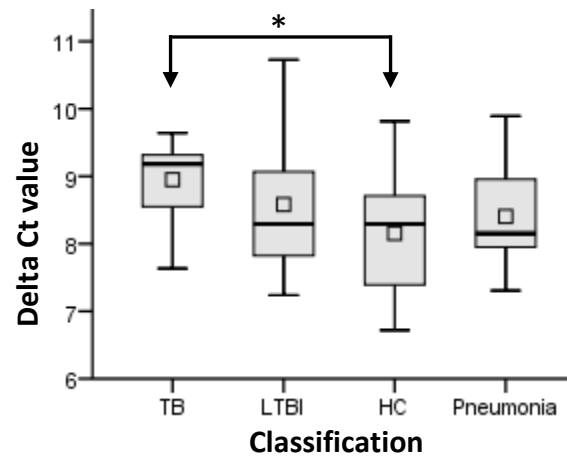

Supplement: 1471-2164-14-74-S4.pdf [file 1471-2164-14-74-S4.pdf]
