# Supplementary material for: A predictive signature gene set for discriminating active from latent tuberculosis in Warao Amerindian children
Source: BMC Genomics. 2013 Feb 1;14:74. doi: 10.1186/1471-2164-14-74 (PMC3600014; doi:10.1186/1471-2164-14-74)
Supplement: Additional file 5: Table S4 — qRT-PCR cycle threshold (delta Ct) values in TB, LTBI, HC and non-TB pneumonia subjects for each of the ten signature genes. The delta Ct was calculated as Ct value (number of cycles required for the fluorescent signal to exceed the background level, a lower Delta Ct value indicates a higher expression) of the target gene – Ct value of the reference gene (GAPDH). [file 1471-2164-14-74-S5.pdf]

| Classification   | Gene  | Subject | Delta Ct value |
|------------------|-------|---------|----------------|
| TB               | ACOT7 | TB1     | 6,28           |
| TB               | ACOT7 | TB2     | 6,52           |
| TB               | ACOT7 | TB3     | 6,49           |
| TB               | ACOT7 | TB4     | 5,85           |
| TB               | ACOT7 | TB5     | 5,17           |
| TB               | ACOT7 | TB6     | 6,12           |
| TB               | ACOT7 | TB7     | 7,32           |
| TB               | ACOT7 | TB8     | 7,36           |
| TB               | ACOT7 | TB9     | 7,13           |
| TB               | ACOT7 | TB10    | 12,72          |
| TB               | ACOT7 | TB11    | 12,95          |
| TB               | AMPH  | TB3     | 19,14          |
| TB               | AMPH  | TB4     | 16,76          |
| TB               | AMPH  | TB5     | 17,13          |
| TB               | AMPH  | TB6     | 13,15          |
| TB               | AMPH  | TB7     | 16,14          |
| TB               | AMPH  | TB8     | 17,39          |
| TB               | AMPH  | TB9     | 15,45          |
| TB               | CHRM2 | TB1     | 16,99          |
| TB               | CHRM2 | TB2     | 18,00          |
| TB               | CHRM2 | TB3     | 15,94          |
| TB               | CHRM2 | TB4     | 18,49          |
| TB               | CHRM2 | TB5     | 18,89          |
| TB               | CHRM2 | TB6     | 15,99          |
| TB               | CHRM2 | TB7     | 18,15          |
| TB               | CHRM2 | TB8     | 18,55          |
| TB               | CHRM2 | TB9     | 15,99          |
| TB               | GLDC  | TB1     | 9,99           |
| TB               | GLDC  | TB2     | 7,12           |
| TB               | GLDC  | TB3     | 6,12           |
| TB               | GLDC  | TB4     | 7,12           |
| TB               | GLDC  | TB5     | 6,12           |
| TB               | GLDC  | TB6     | 7,12           |
| TB               | GLDC  | TB7     | 7,12           |
| TB               | GLDC  | TB8     | 7,12           |
| TB               | GLDC  | TB9     | 7,12           |
| TB               | GLDC  | TB10    | 7,12           |
| TB               | GLDC  | TB11    | 7,12           |
| TB               | GLDC  | TB12    | 7,12           |
| TB               | GLDC  | TB13    | 7,12           |
| TB               | GLDC  | TB14    | 7,12           |
| TB               | GLDC  | TB15    | 7,12           |
| TB               | GLDC  | TB16    | 7,12           |
| TB               | GLDC  | TB17    | 7,12           |
| TB               | GLDC  | TB18    | 7,12           |
| TB               | GLDC  | TB19    | 7,12           |
| TB               | GLDC  | TB20    | 7,12           |
| TB               | GLDC  | TB21    | 7,12           |
| TB               | GLDC  | TB22    | 7,12           |
| TB               | GLDC  | TB23    | 7,12           |
| TB               | GLDC  | TB24    | 7,12           |
| TB               | GLDC  | TB25    | 7,12           |
| TB               | GLDC  | TB26    | 7,12           |
| TB               | GLDC  | TB27    | 7,12           |
| TB               | GLDC  | TB28    | 7,12           |
| TB               | GLDC  | TB29    | 7,12           |
| TB               | GLDC  | TB30    | 7,12           |
| TB               | GLDC  | TB31    | 7,12           |
| TB               | GLDC  | TB32    | 7,12           |
| TB               | GLDC  | TB33    | 7,12           |
| TB               | GLDC  | TB34    | 7,12           |
| TB               | GLDC  | TB35    | 7,12           |
| TB               | GLDC  | TB36    | 7,12           |
| TB               | GLDC  | TB37    | 7,12           |
| TB               | GLDC  | TB38    | 7,12           |
| TB               | GLDC  | TB39    | 7,12           |
| TB               | GLDC  | TB40    | 7,12           |
| TB               | GLDC  | TB41    | 7,12           |
| TB               | GLDC  | TB42    | 7,12           |
| TB               | GLDC  | TB43    | 7,12           |
| TB               | GLDC  | TB44    | 7,12           |
| TB               | GLDC  | TB45    | 7,12           |
| TB               | GLDC  | TB46    | 7,12           |
| TB               | GLDC  | TB47    | 7,12           |
| TB               | GLDC  | TB48    | 7,12           |
| TB               | GLDC  | TB49    | 7,12           |
| TB               | GLDC  | TB50    | 7,12           |
| TB               | GLDC  | TB51    | 7,12           |
| TB               | GLDC  | TB52    | 7,12           |
| TB               | GLDC  | TB53    | 7,12           |
| TB               | GLDC  | TB54    | 7,12           |
| TB               | GLDC  | TB55    | 7,12           |
| TB               | GLDC  | TB56    | 7,12           |
| TB               | GLDC  | TB57    | 7,12           |
| TB               | GLDC  | TB58    | 7,12           |
| TB               | GLDC  | TB59    | 7,12           |
| TB               | GLDC  | TB60    | 7,12           |
| TB               | GLDC  | TB61    | 7,12           |
| TB               | GLDC  | TB62    | 7,12           |
| TB               | GLDC  | TB63    | 7,12           |
| TB               | GLDC  | TB64    | 7,12           |
| TB               | GLDC  | TB65    | 7,12           |
| TB               | GLDC  | TB66    | 7,12           |
| TB               | GLDC  | TB67    | 7,12           |
| TB               | GLDC  | TB68    | 7,12           |
| TB               | GLDC  | TB69    | 7,12           |
| TB               | GLDC  | TB70    | 7,12           |
| TB               | GLDC  | TB71    | 7,12           |
| TB               | GLDC  | TB72    | 7,12           |
| TB               | GLDC  | TB73    | 7,12           |
| TB               | GLDC  | TB74    | 7,12           |
| TB               | GLDC  | TB75    | 7,12           |
| TB               | GLDC  | TB76    | 7,12           |
| TB               | GLDC  | TB77    | 7,12           |
| TB               | GLDC  | TB78    | 7,12           |
| TB               | GLDC  | TB79    | 7,12           |
| TB               | GLDC  | TB80    | 7,12           |
| TB               | GLDC  | TB81    | 7,12           |
| TB               | GLDC  | TB82    | 7,12           |
| TB               | GLDC  | TB83    | 7,12           |
| TB               | GLDC  | TB84    | 7,12           |
| TB               | GLDC  | TB85    | 7,12           |
| TB               | GLDC  | TB86    | 7,12           |
| TB               | GLDC  | TB87    | 7,12           |
| TB               | GLDC  | TB88    | 7,12           |
| TB               | GLDC  | TB89    | 7,12           |
| TB               | GLDC  | TB90    | 7,12           |
| TB               | GLDC  | TB91    | 7,12           |
| TB               | GLDC  | TB92    | 7,12           |
| TB               | GLDC  | TB93    | 7,12           |
| TB               | GLDC  | TB94    | 7,12           |
| TB               | GLDC  | TB95    | 7,12           |
| TB               | GLDC  | TB96    | 7,12           |
| TB               | GLDC  | TB97    | 7,12           |
| TB               | GLDC  | TB98    | 7,12           |
| TB               | GLDC  | TB99    | 7,12           |
| TB               | GLDC  | TB100   | 7,12           |
| TB               | GLDC  | TB101   | 7,12           |
| TB               | GLDC  | TB102   | 7,12           |
| TB               | GLDC  | TB103   | 7,12           |
| TB               | GLDC  | TB104   | 7,12           |
| TB               | GLDC  | TB105   | 7,12           |
| TB               | GLDC  | TB106   | 7,12           |
| TB               | GLDC  | TB107   | 7,12           |
| TB               | GLDC  | TB108   | 7,12           |
| TB               | GLDC  | TB109   | 7,12           |
| TB               | GLDC  | TB110   | 7,12           |
| TB               | GLDC  | TB111   | 7,12           |
| TB               | GLDC  | TB112   | 7,12           |
| TB               | GLDC  | TB113   | 7,12           |
| TB               | GLDC  | TB114   | 7,12           |
| TB               | GLDC  | TB115   | 7,12           |
| TB               | GLDC  | TB116   | 7,12           |
| TB               | GLDC  | TB117   | 7,12           |
| TB               | GLDC  | TB118   | 7,12           |
| TB               | GLDC  | TB119   | 7,12           |
| TB               | GLDC  | TB120   | 7,12           |
| TB               | GLDC  | TB121   | 7,12           |
| TB               | GLDC  | TB122   | 7,12           |
| TB               | GLDC  | TB123   | 7,12           |
| TB               | GLDC  | TB124   | 7,12           |
| TB               | GLDC  | TB125   | 7,12           |
| TB               | GLDC  | TB126   | 7,12           |
| TB               | GLDC  | TB127   | 7,12           |
| TB               | GLDC  | TB128   | 7,12           |
| TB               | GLDC  | TB129   | 7,12           |
| TB               | GLDC  | TB130   | 7,12           |
| TB               | GLDC  | TB131   | 7,12           |
| TB               | GLDC  | TB132   | 7,12           |
| TB               | GLDC  | TB133   | 7,12           |
| TB               | GLDC  | TB134   | 7,12           |
| TB               | GLDC  | TB135   | 7,12           |
| TB               | GLDC  | TB136   | 7,12           |
| TB               | GLDC  | TB137   | 7,12           |
| TB               | GLDC  | TB138   | 7,12           |
| TB               | GLDC  | TB139   | 7,12           |
| TB               | GLDC  | TB140   | 7,12           |
| TB               | GLDC  | TB141   | 7,12           |
| TB               | GLDC  | TB142   | 7,12           |
| TB               | GLDC  | TB143   | 7,12           |
| TB               | GLDC  | TB144   | 7,12           |
| TB               | GLDC  | TB145   | 7,12           |
| TB               | GLDC  | TB146   | 7,12           |
| TB               | GLDC  | TB147   | 7,12           |
| TB               | GLDC  | TB148   | 7,12           |
| TB               | GLDC  | TB149   | 7,12           |
| TB               | GLDC  | TB150   | 7,12           |
| TB               | GLDC  | TB151   | 7,12           |
| TB               | GLDC  | TB152   | 7,12           |
| TB               | GLDC  | TB153   | 7,12           |
| TB               | GLDC  | TB154   | 7,12           |
| TB               | GLDC  | TB155   | 7,12           |
| TB               | GLDC  | TB156   | 7,12           |
| TB               | GLDC  | TB157   | 7,12           |
| TB               | GLDC  | TB158   | 7,12           |
| TB               | GLDC  | TB159   | 7,12           |
| TB               | GLDC  | TB160   | 7,12           |
| TB               | GLDC  | TB161   | 7,12           |
| TB               | GLDC  | TB162   | 7,12           |
| TB               | GLDC  | TB163   | 7,12           |
| TB               | GLDC  | TB164   | 7,12           |
| TB               | GLDC  | TB165   | 7,12           |
| TB               | GLDC  | TB166   | 7,12           |
| TB               | GLDC  | TB167   | 7,12           |
| TB               | GLDC  | TB168   | 7,12           |
| TB               | GLDC  | TB169   | 7,12           |
| TB               | GLDC  | TB170   | 7,12           |
| TB               | GLDC  | TB171   | 7,12           |
| TB               | GLDC  | TB172   | 7,12           |
| TB               | GLDC  | TB173   | 7,12           |
| TB               | GLDC  | TB174   | 7,12           |
| TB               | GLDC  | TB175   | 7,12           |
| TB               | GLDC  | TB176   | 7,12           |
| TB               | GLDC  | TB177   | 7,12           |
| TB               | GLDC  | TB178   | 7,12           |
| TB               | GLDC  | TB179   | 7,12           |
| TB               | GLDC  | TB180   | 7,12           |
| TB               | GLDC  | TB181   | 7,12           |
| TB               | GLDC  | TB182   | 7,12           |
| TB               | GLDC  | TB183   | 7,12           |
| TB               | GLDC  | TB184   | 7,12           |
| TB               | GLDC  | TB185   | 7,12           |
| TB               | GLDC  | TB186   | 7,12           |
| TB               | GLDC  | TB187   | 7,12           |
| TB               | GLDC  | TB188   | 7,12           |
| TB               | GLDC  | TB189   | 7,12           |
| TB               | GLDC  | TB190   | 7,12           |
| TB               | GLDC  | TB191   | 7,12           |
| TB               | GLDC  | TB192   | 7,12           |
| TB               | GLDC  | TB193   | 7,12           |
| TB               | GLDC  | TB194   | 7,12           |
| TB               | GLDC  | TB195   | 7,12           |
| TB               | GLDC  | TB196   | 7,12           |
| TB               | GLDC  | TB197   | 7,12           |
| TB               | GLDC  | TB198   | 7,12           |
| TB               | GLDC  | TB199   | 7,12           |
| TB               | GLDC  | TB200   | 7,12           |
| TB               | GLDC  | TB201   | 7,12           |
| TB               | GLDC  | TB202   | 7,12           |
| TB               | GLDC  | TB203   | 7,12           |
| TB               | GLDC  | TB204   | 7,12           |
| TB               | GLDC  | TB205   | 7,12           |
| TB               | GLDC  | TB206   | 7,12           |
| TB               | GLDC  | TB207   | 7,12           |
| TB               | GLDC  | TB208   | 7,12           |
| TB               | GLDC  | TB209   | 7,12           |
| TB               | GLDC  | TB210   | 7,12           |
| TB               | GLDC  | TB211   | 7,12           |
| TB               | GLDC  | TB212   | 7,12           |
| TB               | GLDC  | TB213   | 7,12           |
| TB               | GLDC  | TB214   | 7,12           |
| TB               | GLDC  | TB215   | 7,12           |
| TB               | GLDC  | TB216   | 7,12           |
| TB               | GLDC  | TB217   | 7,12           |
| TB               | GLDC  | TB218   | 7,12           |
| TB               | GLDC  | TB219   | 7,12           |
| TB               | GLDC  | TB220   | 7,12           |
| TB               | GLDC  | TB221   | 7,12           |
| TB               | GLDC  | TB222   | 7,12           |
| TB               | GLDC  | TB223   | 7,12           |
| TB               | GLDC  | TB224   | 7,12           |
| TB               | GLDC  | TB225   | 7,12           |
| TB               | GLDC  | TB226   | 7,12           |
| TB               | GLDC  | TB227   | 7,12           |
| TB               | GLDC  | TB228   | 7,12           |
| TB               | GLDC  | TB229   | 7,12           |
| TB               | GLDC  | TB230   | 7,12           |
| TB               | GLDC  | TB231   | 7,12           |
| TB               | GLDC  | TB232   | 7,12           |
| TB               | GLDC  | TB233   | 7,12           |
| TB               | GLDC  | TB234   | 7,12           |
| TB               | GLDC  | TB235   | 7,12           |
| TB               | GLDC  | TB236   | 7,12           |
| TB               | GLDC  | TB237   | 7,12           |
| TB               | GLDC  | TB238   | 7,12           |
| TB               | GLDC  | TB239   | 7,12           |
| TB               | GLDC  | TB240   | 7,12           |
| TB               | GLDC  | TB241   | 7,12           |
| TB               | GLDC  | TB242   | 7,12           |
| TB               | GLDC  | TB243   | 7,12           |
| TB               | GLDC  | TB244   | 7,12           |
| TB               | GLDC  | TB245   | 7,12           |
| TB               | GLDC  | TB246   | 7,12           |
| TB               | GLDC  | TB247   | 7,12           |
| TB               | GLDC  | TB248   | 7,12           |
| TB               | GLDC  | TB249   | 7,12           |
| TB               | GLDC  | TB250   | 7,12           |
| TB               | GLDC  | TB251   | 7,12           |
| TB               | GLDC  | TB252   | 7,12           |
| TB               | GLDC  | TB253   | 7,12           |
| TB               | GLDC  | TB254   | 7,12           |
| TB               | GLDC  | TB255   | 7,12           |
| TB               | GLDC  | TB256   | 7,12           |
| TB               | GLDC  | TB257   | 7,12           |
| TB               | GLDC  | TB258   | 7,12           |
| TB               | GLDC  | TB259   | 7,12           |
| TB               | GLDC  | TB260   | 7,12           |
| TB               | GLDC  | TB261   | 7,12           |
| TB               | GLDC  | TB262   | 7,12           |
| TB               | GLDC  | TB263   | 7,12           |
| TB               | GLDC  | TB264   | 7,12           |
| TB               | GLDC  | TB265   | 7,12           |
| TB               | GLDC  | TB266   | 7,12           |
| TB               | GLDC  | TB267   | 7,12           |
| TB               | GLDC  | TB268   | 7,12           |
| TB               | GLDC  | TB269   | 7,12           |
| TB               | GLDC  | TB270   | 7,12           |
| TB               | GLDC  | TB271   | 7,12           |
| TB               | GLDC  | TB272   | 7,12           |
| TB               | GLDC  | TB273   | 7,12           |
| TB               | GLDC  | TB274   | 7,12           |
| TB               | GLDC  | TB275   | 7,12           |
| TB               | GLDC  | TB276   | 7,12           |
| TB               | GLDC  | TB277   | 7,12           |
| TB               | GLDC  | TB278   | 7,12           |
| TB               | GLDC  | TB279   | 7,12           |
| TB               | GLDC  | TB280   | 7,12           |
| TB               | GLDC  | TB281   | 7,12           |
| TB               | GLDC  | TB282   | 7,12           |
| TB               | GLDC  | TB283   | 7,12           |
| TB               | GLDC  | TB284   | 7,12           |
| TB               | GLDC  | TB285   | 7,12           |
| TB               | GLDC  | TB286   | 7,12           |
| TB               | GLDC  | TB287   | 7,12           |
| TB               | GLDC  | TB288   | 7,12           |
| TB               | GLDC  | TB289   | 7,12           |
| TB               | GLDC  | TB290   | 7,12           |
| TB               | GLDC  | TB291   | 7,12           |
| TB               | GLDC  | TB292   | 7,12           |
| TB               | GLDC  | TB293   | 7,12           |
| TB               | GLDC  | TB294   | 7,12           |
| TB               | GLDC  | TB295   | 7,12           |
| TB               | GLDC  | TB296   | 7,12           |
| TB               | GLDC  | TB297   | 7,12           |
| TB               | GLDC  | TB298   | 7,12           |
| TB               | GLDC  | TB299   | 7,12           |
| TB               | GLDC  | TB300   | 7,12           |
| Non-TB pneumonia | ACOT7 | PNEU1   | 6,99           |
| Non-TB pneumonia | ACOT7 | PNEU2   | 5,53           |
| Non-TB pneumonia | ACOT7 | PNEU3   | 7,23           |
| Non-TB pneumonia | ACOT7 | PNEU4   | 6,26           |
| Non-TB pneumonia | ACOT7 | PNEU5   | 6,57           |
| Non-TB pneumonia | ACOT7 | PNEU6   | 6,91           |
| Non-TB pneumonia | ACOT7 | PNEU7   | 7,16           |
| Non-TB pneumonia | ACOT7 | PNEU8   | 7,37           |
| Non-TB pneumonia | ACOT7 | PNEU9   | 7,37           |
| Non-TB pneumonia | ACOT7 | PNEU10  | 6,82           |
| Non-TB pneumonia | ACOT7 | PNEU11  | 6,68           |
| Non-TB pneumonia | ACOT7 | PNEU12  | 6,83           |
| Non-TB pneumonia | ACOT7 | PNEU13  | 7,30           |
| Non-TB pneumonia | ACOT7 | PNEU14  | 7,39           |
| Non-TB pneumonia | ACOT7 | PNEU15  | 7,09           |
| Non-TB pneumonia | ACOT7 | PNEU16  | 7,11           |
| Non-TB pneumonia | ACOT7 | PNEU17  | 7,11           |
|                  |       |         |                |
